# Supplementary material for: Persistent but dysfunctional mucosal SARS-CoV-2-specific IgA and low lung IL-1β associate with COVID-19 fatal outcome: A cross-sectional analysis
Source: PubMed Central journal article supplement (PMC9560774; doi:10.3389/fimmu.2022.842468), 2022-09-29
Supplement: DataSheet_1.pdf [file DataSheet_1.pdf]

# Persistent but Dysfunctional Mucosal SARS-CoV-2-specific IgA and Low Lung IL-1beta associate with COVID 19 Fatal Outcome: a Cross-sectional Analysis

Maria Julia Ruiz <sup>1,2,3</sup>, Gabriel Siracusano<sup>4</sup>, Andréa Cottignies-Calamarte <sup>1,2,3</sup>, Daniela Tudor <sup>1,2,3</sup>, Fernando Real <sup>1,2,3</sup>, Aiwei Zhu <sup>1,2,3</sup>, Claudia Pastori <sup>4</sup>, Claude Capron <sup>5</sup>, Arielle R. Rosenberg <sup>1,2,3,7</sup>, Nigel Temperton <sup>6</sup>, Diego Cantoni <sup>6</sup>, Hanqing Liao <sup>8</sup>, Nicola Ternette <sup>8</sup>, Pierre Moine <sup>9</sup>, Mathieu Godement <sup>9</sup>, Guillaume Geri <sup>10,11</sup>, Jean-Daniel Chiche <sup>12</sup>, Djillali Annane <sup>9</sup>,

## Supplementary Figures and Legends

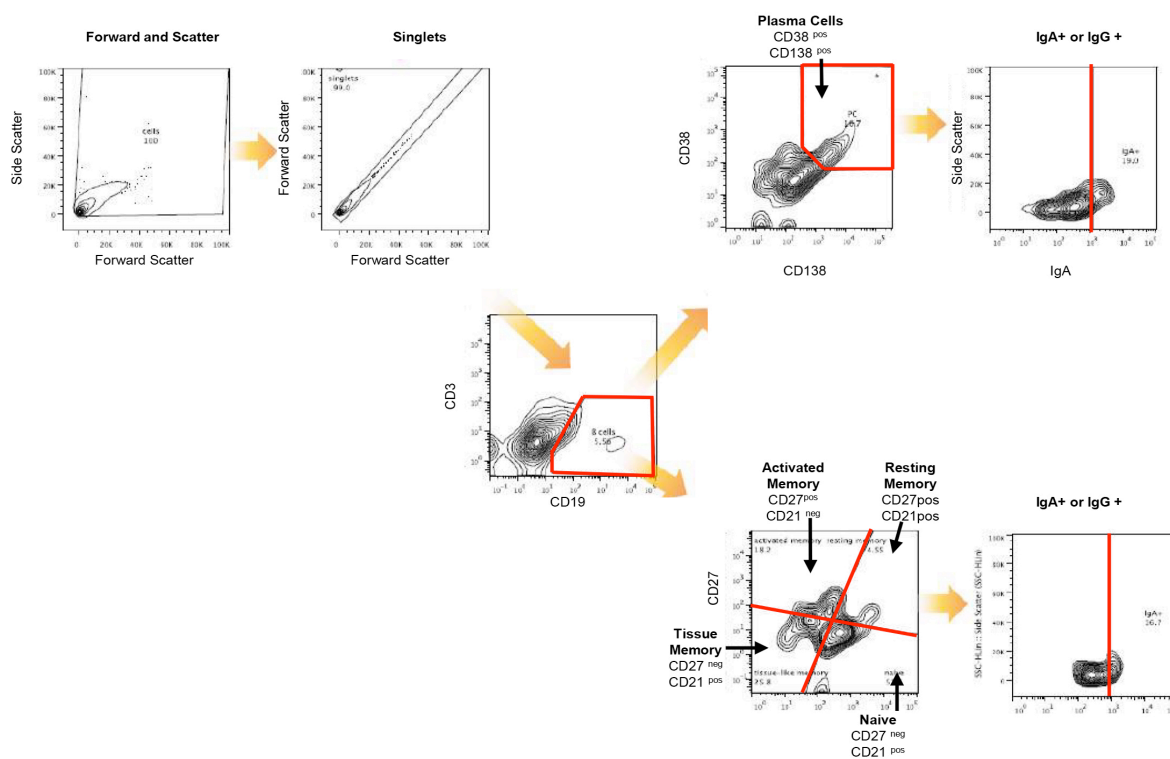

**S1: Flow cytometry gating strategy for the characterization of B cell from BAL of SARS-CoV-2 infected individuals.** Representative dot plot of BAL single cell suspensions studied by multiparametric flow cytometry, showing the gating strategy. After cell-doublet exclusion (Forward Scatter vs Forward Scatter, Singlet Dot Plot) B cells were gated based on their expression of CD19. After gating on CD19<sup>+</sup> B cell population, Naïve B cells were defined as CD27<sup>neg</sup> CD21<sup>pos</sup>, Resting Memory B cells as CD27<sup>pos</sup> CD21<sup>pos</sup>, Activated Memory B cells as

CD27<sup>pos</sup> CD21<sup>neg</sup>, Tissue Memory B cells as CD27<sup>neg</sup> CD21<sup>pos</sup> and Plasma B cells as CD38<sup>pos</sup> CD138<sup>pos</sup>. Each population was then gated to measure their expression of IgG or IgA.

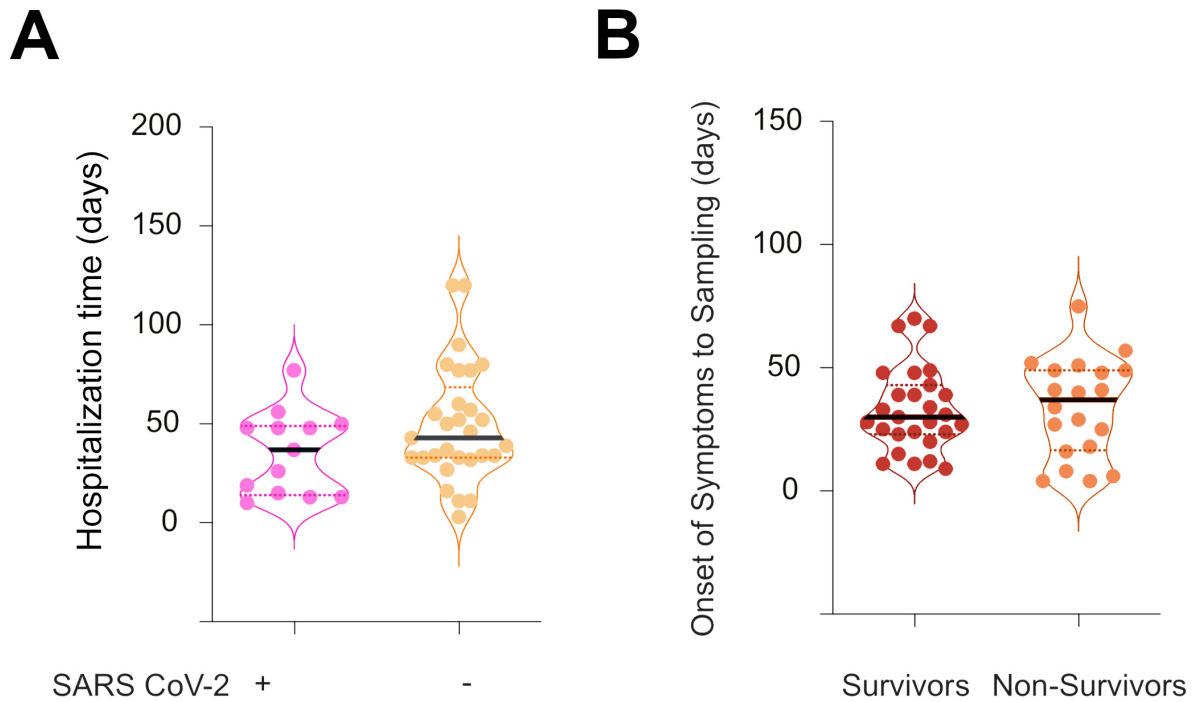

**S2: Hospitalization time in SARS-CoV-2 infected individuals. (A)** Comparison of the duration of hospitalization (days) in SARS-CoV-2+ BAL and SARS-CoV-2- BAL individuals. **(B)** Comparison of the time of onset of symptoms to sampling in Survivors vs Non-Survivors.

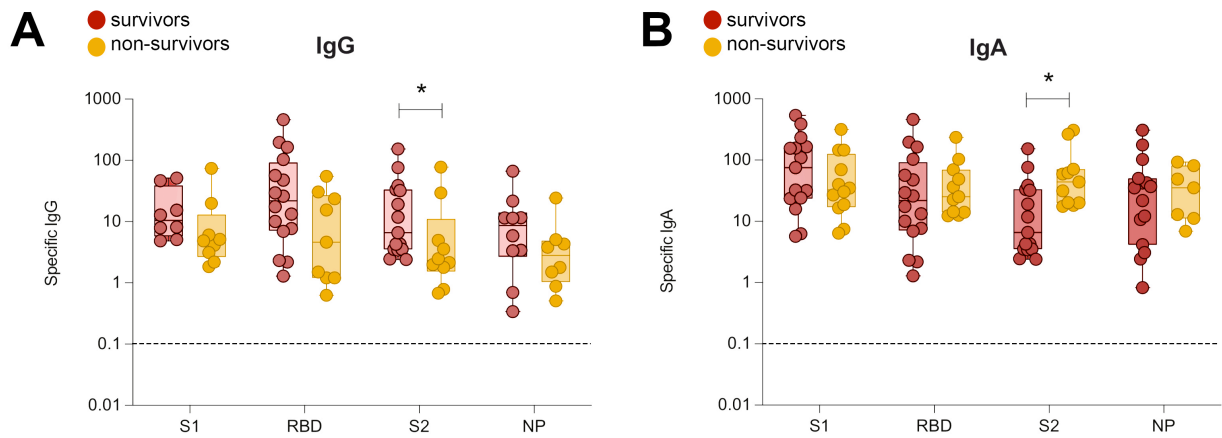

**S3: Comparison of specific IgG and IgA anti SARS-CoV-2 antibody response in Survivors vs Non-Survivors. (A)** Comparison between IgG responses against S1, S2, RBD and NP in Survivors vs Non-Survivors. **(B)** Comparison between IgA responses against S1, S2, RBD and NP in Survivors vs Non-Survivors. *p* values were calculated by using *Mann-Whitney* test. Dashed line: Cut-off value for detection.
